1 Title:

2 Biomechanical Risk Factors for Anterior Cruciate Ligament Injury in Young Female

3 Basketball Players: A pilot Study

4

5 Abstract:

6 Objectives: This study was aimed to reveal the differences in knee valgus angle at landing as a

7 static indicator and wobbling movement of the knee during landing as a dynamic indicator

8 between ACL injury and uninjured athletes.

9 Methods: This study was case-control study. There were 6 female basketball players with

10 ACL injuries and 38 female basketball players without them, whose knee kinematics were

11 measured using 2-dimensional video cameras during single-leg jump landings. The task was

12 performed from 30cm-box. Knee kinematics and wobbling of the knee which was calculated

13 by relative frontal motion to the flexion movement were compared between knees with ACL-

14 injured and uninjured.

15 Results: Six athletes who had confirmed ACL injuries, did not demonstrate significantly

16 different knee valgus angle at initial contact and maximum knee flexion during landing,

17 compared to 38 uninjured athletes. The knee valgus angles at initial contact for injured and

18 uninjured athletes were  $12.3^\circ$  and  $14.8^\circ$  ( $p = 0.15$ ), respectively. Five of six anterior cruciate  
19 ligament injured knees presented knee wobbling during landing. Relative frontal motion at  
20  $18^\circ$  knee flexion was significantly greater in athletes with ACL-injured ( $p = 0.02$ ).

21 Conclusions: 84% of ACL injury presented with the knee wobbling and the frontal knee  
22 motion was greater with low knee flexion during knee wobbling, while the knee valgus angle  
23 was not significantly different. This study suggests that knee wobbling may be a  
24 biomechanical and dynamic risk factor for ACL injury in female basketball players.

25

26 Key Terms: anterior cruciate ligament injury, knee, biomechanics, female athlete, basketball

27

## 28 **Summary Box**

29 What is already known on this topic – summarise the state of scientific knowledge on this  
30 subject before you did your study and why this study needed to be done

31 Biomechanical risk factor for ACL injury was revealed as dynamic knee valgus and low knee  
32 flexion which increases ACL strain. However, previous study focused only static index which  
33 are knee angle at initial contact or maximum. This study aimed to establish new dynamic  
34 index for screening of ACL injury.

35 What this study adds – summarise what we now know as a result of this study that we did not

36 know before

37 Although a previous study identified knee valgus angle and knee valgus moment as predictors

38 of ACL injury, many athletes who demonstrates knee valgus motion does not suffer ACL

39 injury. Cadaveric studies show that ACL strain did not increase when knee valgus occurred

40 with slowed knee flexion movement. We identified an abnormal knee movement involving

41 the dynamic knee valgus with low knee flexion, which we call “knee wobbling.”

42 How this study might affect research, practice or policy – summarise the implications of this

43 study

44 ACL injury has been difficult to predict; however, we found that knee wobbling, which is new

45 parameter of abnormal knee movement, including rapid knee valgus/varus, is a potential

46 predictor of ACL injury.

47

48

## 49 INTRODUCTION

50 Anterior cruciate ligament (ACL) injury is a severe sports injury<sup>1</sup>. Annually,  
51 250,000 cases of ACL injury are reported in the United States<sup>2</sup> alone. The medical cost for  
52 one case is approximately \$17,000<sup>3</sup>. Nationwide, the cost of reconstructive surgery and  
53 rehabilitation for treatment of ACL injuries represents an economic loss of approximately  
54 \$4.2 billion annually. The incidence of ACL injury is especially higher among female  
55 adolescents<sup>4</sup>. Female athletes frequently suffer ACL injuries in noncontact situations that are  
56 typically caused by an external load upon the knee joint during a landing, slowing, or  
57 pivoting<sup>5,6</sup>. Despite efforts at prevention internationally, the incidence of ACL injury in female  
58 athletes has not decreased<sup>7</sup>. There is still no consensus on why the incidence of ACL injury  
59 among female athletes is so high, although gender differences, including anatomical,  
60 hormonal, and neuromuscular factors are thought to affect the incidence of ACL injury<sup>8</sup>.  
61 There is no incontrovertible evidence showing that anatomical or hormonal factors directly or  
62 indirectly lead to incidence of ACL injury. Only neuromuscular factors are modifiable as  
63 preventative methods, which led researchers to screen athletes with biomechanical testing.  
64 Many neuromuscular risk factors associated with ACL injury have been proposed, including  
65 an increase in the valgus knee angle<sup>10</sup>, tibial internal rotation<sup>11</sup>, anterior tibial shear force,<sup>12</sup>

66 hip joint valgus<sup>13</sup>, and adduction<sup>14</sup> or a decrease in the knee joint flexion angle<sup>12</sup> or trunk  
67 bending angle<sup>15</sup> during athletics. However, Bahr et al.<sup>9</sup> claimed that no screening test can  
68 predict ACL injury and that no intervention study supports the efficacy of screening. This  
69 would be caused since ACL injury occurs with dynamic loads and factors. Establishing  
70 dynamic parameters is required for more effective screening methods in order to identify  
71 high-risk athletes.

72

73 Previous screening methods focused only on an increasing valgus angle in  
74 snapshots. The knee valgus angle at IC during a drop vertical jump (DVJ) was reportedly  
75 significantly higher in those with an ACL injury than those without<sup>10</sup>. However, many  
76 uninjured subjects presented the same amount of knee valgus angle; therefore, there were  
77 many false positive subjects in the study<sup>10</sup>. Krosshaug et al.<sup>18</sup> showed that knee valgus angle  
78 during DVJ did not predict ACL injury. These studies analyzed only a snapshot of knee  
79 movement during landing, and dynamic knee motion during single leg activity has not been  
80 investigated. ACL injury often occurs during deceleration with slight knee flexion (<25°),  
81 valgus, and with internal or external rotation<sup>16,17</sup>. From an analysis of knee kinematics at the  
82 time of ACL injury in female athletes, using a model-based image matching technique, Koga

83 et al.<sup>16</sup> showed that the knee valgus angle increased by 12°, while the knee flexion angle  
84 increased by only 1° between the initial contact (IC) of the foot during the movement that  
85 caused the ACL injury and 40 ms after IC. This study showed that both increasing knee  
86 valgus angle and disappearing flexion movement occurred simultaneously at ACL injury.  
87 Detecting the combined phenomenon would be necessary for considering risk factors of ACL  
88 injury. Only one study examined dynamic knee movement as an index for fluency of knee  
89 motion during single leg hops<sup>19</sup>. Roos et al.<sup>19</sup> showed that knee fluency, meaning without  
90 dynamic knee valgus or varus movement, was decreased in ACL-deficient knees more than  
91 ACL-intact and ACL-reconstructed knees. Accordingly, combined slight knee flexion and  
92 dynamic valgus would be considered a risk factor. However, no study has established the  
93 assessment of the dynamic parameter and has identified the association between the new  
94 parameter and ACL injury as a potential risk factor.

95

96 Better screening methods also need to reproduce the injury mechanism with single-  
97 leg tasks. Single-leg activities should be investigated, because many ACL injuries occur  
98 during high-impact activity with one leg<sup>6</sup>. However, DVJs with both legs have been utilized in  
99 the majority of previous studies. Although some previous studies that utilized single-leg

100 landings, these studies showed only maximum knee valgus or flexion angle<sup>20,21</sup>. This is not  
101 adequate to assess dynamic knee control during single-leg activities. In our preliminary study,  
102 24 female athletes performed single-leg jump landings (SLJL). This was an appropriate task  
103 for single-leg, high-impact activities. Repeated valgus/varus knee motion (knee wobbling)  
104 was observed, and this may be used as an index of dynamic parameters. We speculate that  
105 knee wobbling at low knee flexion during SLJL is an unstable dynamic knee movement that  
106 may be associated with ACL injury. The objective of this pilot study was to determine  
107 differences in knee valgus angle and dynamic knee joint motion during single-leg landings in  
108 female basketball players, comparing ACL-injured and uninjured athletes by following them  
109 for 3 years. The hypotheses of this study were that (1) there is no difference in the knee valgus  
110 angle between ACL-injured and ACL-uninjured knees during single-leg landings, and (2)  
111 knee wobbling movement is more frequent in ACL-injured knees than ACL-uninjured knees.  
112 We utilized a case-control design to compare knee kinematics between the ACL-injured and  
113 uninjured groups by recording kinematic data during SLJL in female basketball athletes at  
114 baseline, and by gathering data about non-contact ACL injuries during up to three years of  
115 follow-up.  
116

## 117 **METHODS**

### 118 **Subjects**

119           This is a case-control study (Level of Evidence: 3). The study commenced after  
120 obtaining approval of the ethics committee of Institutional Review Board of our institution  
121 and informed, written consent of all subjects and their parents. Recruitment was conducted  
122 from 2010 to 2013. Inclusion criteria were: (1) athletes participating in basketball team sports  
123 (competition level); (2) 12-18 years old; (3) female; (4) healthy. Subjects who had any  
124 neurological diseases, orthopedic diseases, or communication disorders at the time of data  
125 measurement were excluded from the study. Forty-four subjects of two groups agreed to  
126 participate in this study. After recruitment and measurement, information on the incidence of  
127 non-contact ACL injuries was collected for two or three years. At follow-up, six ACL injuries  
128 had occurred. All ACL injuries were diagnosed by an orthopedic surgeon based on magnetic  
129 resonance imaging (MRI) findings. ACL injuries that occurred with no contact with another  
130 person or object at the time of injury were defined as non-contact ACL injuries. Participants  
131 were instructed to report all knee injuries to their coaches and the coaches were instructed to  
132 relay the information to the investigators. One investigator continued to contact coaches.  
133 Participants played only basketball during the follow-up period.



134

### 135 **Data Acquisition**

136           Subjects wore T-shirts and spats and each subject had six reflective markers  
137 attached to her body for video analyses. The reflective markers were 10 mm in diameter and  
138 were attached at the greater trochanter, the middle of the patella, and the lateral malleolus on  
139 both legs. Subjects performed SLJL with both legs, landing with one leg after a maximum  
140 vertical jump from a single-leg standing position on the floor. Two digital video cameras  
141 (Casio Computer Co., Ltd., Japan) were used at 30 Hz. Cameras were located in the front and  
142 ipsilateral side, 350 cm from the subject and 93 cm from the floor. The knee valgus and  
143 flexion angle during SLJL were measured for lower limb kinematics in each frame. The  
144 reliability of knee valgus angle for a two-dimensional video analysis at 30 was sufficient to  
145 correlate with motion capture during this SLJL<sup>22</sup>.

146

### 147 **Data Processing**

148           We used an Ulead Video Studio 11 (Corel Japan Ltd., Japan) to convert video  
149 images into static images at 30 frames/s, and computed the knee valgus and flexion angle in  
150 each frame. We then used ImageJ 1.86 (National Institutes of Health, United States) to

151 measure each joint angle on static images. The knee valgus and flexion angle were obtained  
152 by deducting the angle formed by a line connecting the greater trochanter, the middle of the  
153 patella and the lateral malleolus from  $180^\circ$ . The analyzed phase during SLJL was between IC  
154 to maximal knee flexion (MKF). IC was defined as the point when a part of the foot touched  
155 the floor, while the MKF was defined as when the knee flexion angle reached its maximum  
156 value. All measurements and data analysis were performed by different trained investigators.

157

158           Relative frontal motion (RFM) was used as an index of knee valgus/varus  
159 movement relative to flexion movement during landing. More precisely, RFM was calculated  
160 by the amount of valgus/varus movement in the frontal plane during 1/30 second divided by  
161 the amount of flexion movement in the sagittal plane (Figure 1). In order to calculate knee  
162 movement at low knee flexion, the knee flexion and valgus angle at IC was set as  $0^\circ$ . Then,  
163 the predictive valgus angle at  $6^\circ$ ,  $12^\circ$ ,  $18^\circ$ ,  $24^\circ$  and  $30^\circ$  for standardized knee flexion angle  
164 was calculated based on two time points. Positive RFM indicated valgus movement, while  
165 negative RFM denoted varus. Positive and negative RFM on successive jumps were  
166 interpreted as knee wobbling (Figure 2a). The number of RFM's between IC and MKF was  
167 counted. On the other hand, those with only positive or negative RFM's were excluded

168 (Figure 2b). The method we developed during a previous study for detecting knee

169 valgus/varus movement with RFM was further validated in the present study<sup>23</sup>.

170

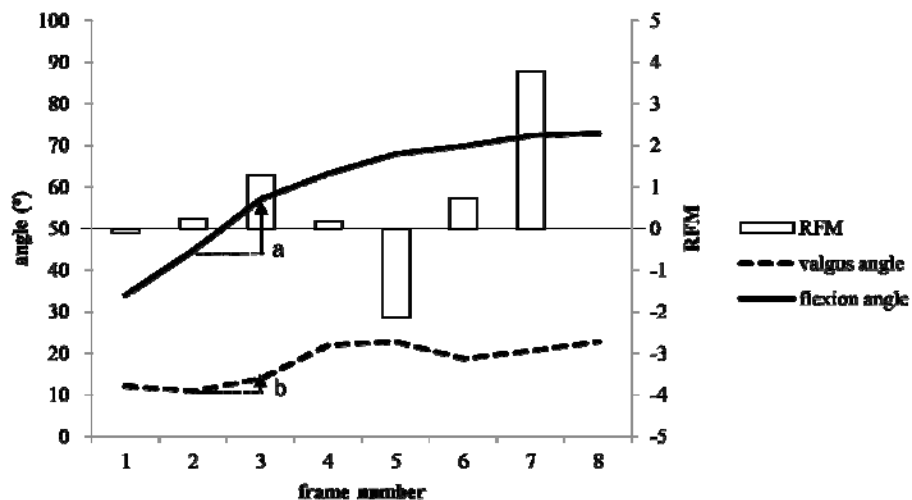

171

172 Figure 1. Determination of relative frontal motion (RFM)

173 This graph shows one kinematic dataset from a single-leg landing. RFM was calculated as the

174 amount of valgus/varus movement in the frontal plane (a) divided by the amount of flexion in

175 the sagittal plane (b) during 1/30 second.

176

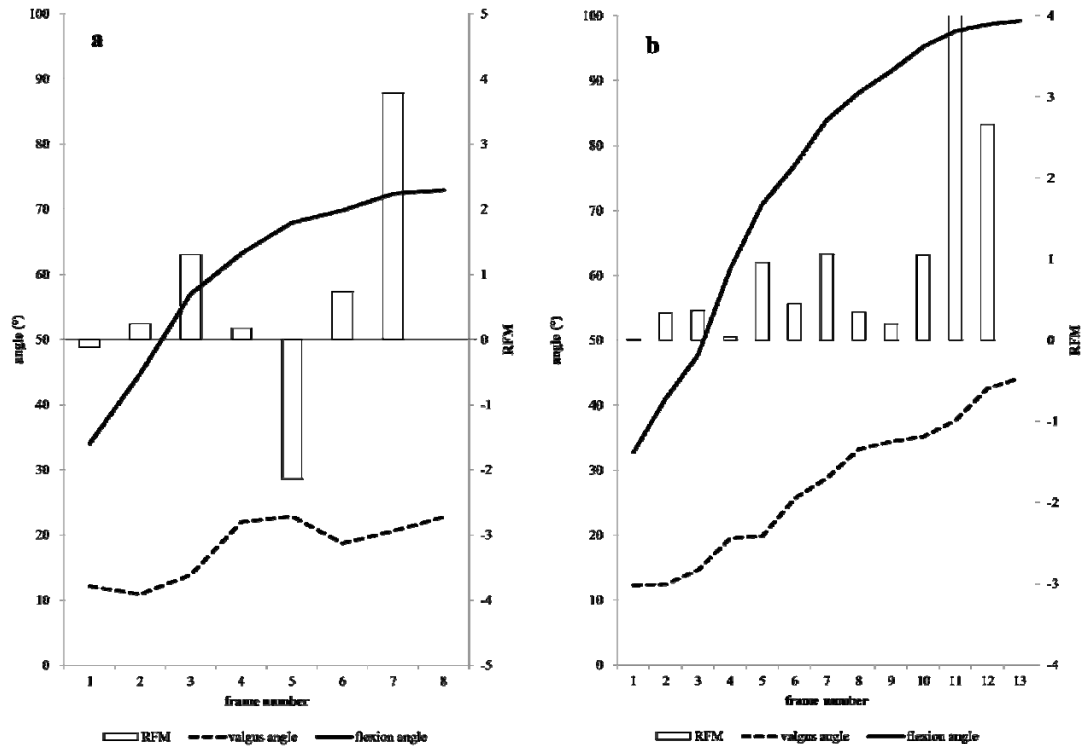

177

178 Figure 2. Kinematic data showing repeated knee wobbling and no knee wobbling.

179 (a) Repeated positive and negative RFMs were present. This RFM crossed the zero line

180 between Frames 4 and 5 and between Frames 5 and 6. (b) An example of kinematic data with

181 no knee wobbling. Only positive RFM values are present. This RFM never crossed the zero

182 line.

183

184

185

186

## 187 **Statistical Analyses**

188           Subjects were divided into two groups: ACL-injured and uninjured groups. We  
189           computed the mean and standard deviation (SD) of valgus knee angle and flexion angle at IC  
190           and MKF and the data presented a normal distribution. T-tests with Bonferroni adjustment  
191           were used as parametric tests to compare groups. Chi-square tests were used to assess  
192           differences in knee wobbling between ACL-injured and uninjured knees. We used Predictive  
193           Analytics Software (PASW) Statistics 18 (Statistical Product and Service Solutions (SPSS),  
194           Inc., United States) for statistical analysis, and set the significance level at  $\alpha < 0.05$ .

195

## 196 **RESULTS**

197           Six athletes suffered ACL injury after the three-year follow-up period. Table 1  
198           shows the profiles of the six subjects with ACL injuries. There were no significant differences  
199           between the six ACL-injured and 38 uninjured subjects in terms of age (ACL-injured:  $15.5 \pm$   
200            $1.2$  years; uninjured:  $16.1 \pm 0.3$  years;  $p = 0.28$ ), height (ACL-injured:  $163.6 \pm 4.8$  cm;  
201           uninjured:  $159.5 \pm 5.8$  cm;  $p = 0.11$ ), weight (ACL-injured:  $51.7 \pm 6.5$  kg; uninjured:  $52.7 \pm$   
202            $6.0$  kg;  $p = 0.71$ ) (Table 2).

203

| ACL-injured subject | Age range at time of injury (years) | Injury scene |
|---------------------|-------------------------------------|--------------|
| Case 1              | 16-18                               | Game         |
| Case 2              | 16-18                               | Practice     |
| Case 3              | 16-18                               | Game         |
| Case 4              | 16-18                               | Game         |
| Case 5              | 16-18                               | Recreation   |
| Case 6              | 12-15                               | Game         |

204

Table 2. Physical characteristics of subjects with and without ACL injuries

|                          | ACL-injured subjects | Uninjured subjects | <i>p</i> value |
|--------------------------|----------------------|--------------------|----------------|
| n (persons)              | 6                    | 38                 |                |
| Age (years) <sup>a</sup> | 15.5 ± 1.2           | 16.1 ± 0.3         | 0.28           |
| Height (cm) <sup>a</sup> | 163.6 ± 4.8          | 159.9 ± 5.8        | 0.11           |
| Weight (kg) <sup>a</sup> | 51.7 ± 6.5           | 52.7 ± 6.0         | 0.71           |

<sup>a</sup>: Mean value ± standard deviation

205

206 Inter-group comparisons of kinematics during SLJL were performed on the two  
207 groups: 6 knees with ACL injuries belonging to 6 subjects and 76 uninjured knees belonging  
208 to 38 subjects. Ten uninjured knees were difficult to analyze due to missing markers and were  
209 excluded from this study. No differences were detected between the six ACL-injured and 66  
210 uninjured knees in terms of knee valgus, flexion at IC, or MKF (Table 3). Accordingly, no  
211 difference in knee joint motion was discernible between the ACL-injured and uninjured knees.  
212

Table 3. Valgus knee angle and flexion angles at initial contact and maximal knee flexion

|             | Analysis point | ACL-injured<br>knees<br>(6 knees) | Uninjured knees<br>(66 knees) | <i>p</i> value |
|-------------|----------------|-----------------------------------|-------------------------------|----------------|
| Valgus (°)  | IC             | 12.3 ± 2.4                        | 14.8 ± 4.1                    | 0.15           |
|             | MKF            | 29.3 ± 9.8                        | 27.8 ± 10.0                   | 0.73           |
| Flexion (°) | IC             | 34.0 ± 5.3                        | 37.0 ± 5.3                    | 0.19           |
|             | MKF            | 86.0 ± 10.5                       | 82.7 ± 8.5                    | 0.38           |

Mean value ± standard deviation

IC: initial contact

MKF: Maximal knee flexion

213



214 Wobbling of the knee was observed in many subjects in both ACL-injured and  
215 uninjured knees during SLJL. Although there is no significant difference by chi-square test ( $p$   
216 = 0.55), the rate of occurrence of knee wobbling was larger in five of the six ACL-injured  
217 knees than 41 of the 66 uninjured knees, in at least one jump. No significant difference in  
218 relative frontal motion (RFM) was detected between ACL-injured and uninjured knees (Table  
219 4). The RFM's for ACL-injured knees and uninjured knees at 12°, 18°, 24°, and 30° of knee  
220 flexion were  $0.09 \pm 0.43$  and  $0 \pm 0.25$  ( $p = 0.66$ ),  $0.42 \pm 0.52$  and  $0.10 \pm 0.31$  ( $p = 0.02$ ),  $0.23$   
221  $\pm 0.37$  and  $0.13 \pm 0.31$  ( $p = 0.45$ ),  $0.16 \pm 0.46$  and  $0.13 \pm 0.48$  ( $p = 0.88$ ), respectively.  
222 Therefore, the RFM was significantly greater only at 18° in ACL-injured knees.

223

Table 4. RFM at each knee flexion angle

|                  | Analysis point<br>(knee flexion<br>angle) | ACL-injured<br>knees<br>(6 knees) | Uninjured<br>knees<br>(66 knees) | $p$ value |
|------------------|-------------------------------------------|-----------------------------------|----------------------------------|-----------|
| RFM <sup>a</sup> | 12°                                       | $0.09 \pm 0.43$                   | $0 \pm 0.25$                     | 0.66      |
|                  | 18°                                       | $0.42 \pm 0.52$                   | $0.10 \pm 0.31$                  | 0.02      |
|                  | 24°                                       | $0.23 \pm 0.37$                   | $0.13 \pm 0.31$                  | 0.45      |
|                  | 30°                                       | $0.16 \pm 0.46$                   | $0.13 \pm 0.48$                  | 0.88      |

<sup>a</sup>: Mean value  $\pm$  standard deviation

RFM: relative frontal motion

224

## 225 **DISCUSSION**

226           The objective of this study was to determine the difference in valgus knee angle and  
227 knee joint motion between knees that had sustained ACL injuries and those that had not,  
228 during SLJL in middle school and high school female basketball players during three years.

229           The knee valgus angle at IC and MKF did not differ significantly between ACL-injured knees  
230 and uninjured knees, and abnormal knee joint motion was present in most ACL-injured knees  
231 and uninjured knees, but especially in ACL-injured knees.

232

233           A combination of low knee flexion and valgus motion was observed in ACL-injured  
234 knees<sup>24</sup>. Therefore, screening tasks for ACL injury risks should induce such movement.

235           Valgus angle at landing has been the parameter most evaluated as a potential risk factor<sup>10,16,17</sup>.

236           A previous study indicated that an increase in the knee valgus angle and valgus moment  
237 during landing are considered risk factors for non-contact ACL injury<sup>10</sup>. However, many

238 uninjured subjects presented the same knee valgus angle as the injured subjects<sup>10</sup>. In the

239 current study, the knee valgus angle showed no difference between ACL-injured and

240 uninjured knees in either IC or MKF. Thus, we concluded that the knee valgus angle alone

241 during landing is insufficient to portend ACL injury. Another parameter examined was knee

242 flexion angle at IC during landing. The knee flexion angle at the time of ACL injury was  
243 between 5 and 25° during single-leg landing or deceleration<sup>25</sup>. The current study found that  
244 the knee flexion angle at IC during SLJL was 34.0° for ACL-injured knees and 37.0° for  
245 uninjured knees. In a previous study using a motion capture system, the knee flexion angle at  
246 IC during a bilateral vertical drop was reportedly 31°<sup>26</sup>. Therefore, knee flexion was greater  
247 during single-leg landing than bilateral-leg landing. Despite the high flexion angle at landing  
248 during SLJL, landing movement with one leg would be more appropriate as a screening task  
249 to detect risk factors than that with both legs during a landing task considering that ACL  
250 injury occurs during single-leg activities.

251

252 RFM may serve as an index of dynamic knee motion in the frontal and sagittal  
253 planes. Previous studies screened knee kinematics using only snapshots at IC or MKF<sup>10</sup>. The  
254 RFM used in this study was the amount of change in the frontal plane angle during 1/30 s  
255 divided by the amount of change in the sagittal plane angle. The greater RFM at 18° in ACL-  
256 injured knees suggests a sudden valgus or varus and slow flexion movement. Therefore, RFM  
257 clearly demonstrated the quality of dynamic valgus/varus movement during landing when  
258 compared with snapshots of knee angle at IC or MKF. Decreasing knee flexion movement

259 during landing should be taken into consideration to detect high-risk athletes. A cadaveric  
260 study showed that the combined knee valgus external torque at slight knee flexion angle  
261 induced excessive ACL strain. In the current study, five of the six ACL-injured knees showed  
262 knee wobbling, which led us to consider this as a risk factor for ACL injury. The cause of this  
263 abnormal knee movement is unknown, and the mechanism of knee wobbling and the  
264 association between wobbling and ACL injury should be studied in the future. Since the  
265 flexion angle exceed  $30^\circ$  during the SLJL, knee wobbling over a smaller flexion range should  
266 be induced and evaluated in future studies.

267

268 This study had several limitations. First, we used video cameras for kinematic  
269 analyses. Nagano et al.<sup>27</sup> performed a study to obtain correlations based on regression analysis  
270 between two-dimensional and three-dimensional knee kinematics and there was a moderate  
271 association between the two methods. Since two-dimensional evaluation is a simple, low-cost  
272 technique, we believe that it is a more useful method than three-dimensional analysis when  
273 conducting a large-scale study of risk factors. Also, RFM was calculated based on the amount  
274 of change and it is not dependent on the method of capture. Second, conclusions of this study  
275 cannot be generally applied to males or to athletes involved in other sports. However, this

276 study did follow up female young basketball athletes for a long time and this is a strong point.

277 Third, although the sample size was not large, the post-hoc power was medium to high, which

278 were 0.41 for t-tests and 0.50 for chi-square tests. In the future, there needs to be a larger

279 study with high accuracy, including athletes involved in other high-risk sports, for example,

280 soccer or football.

281

282 Conclusion

283 No differences in the knee valgus or flexion angles at IC or MKF during the SLJL

284 was detected between the ACL-injured and uninjured knees. Knee wobbling may be more

285 common in ACL-injured athletes and greater RFM at 18° during landing may be a potential

286 risk factor for ACL injury. Future studies should evaluate knee kinematics in a smaller knee

287 flexion range during movement using a different screening task.

288

289

290 **REFERENCES**

- 291 1. Silvers HJ, Mandelbaum BR. Prevention of anterior cruciate ligament  
292 injury in the female athlete. *Br J Sports Med.* 2007;41 Suppl 1:i52-59.
- 293 2. Griffin LY, Albohm MJ, Arendt EA, et al. Understanding and preventing  
294 noncontact anterior cruciate ligament injuries: a review of the Hunt Valley  
295 II meeting, January 2005. *Am J Sports Med.* 2006;34(9):1512-1532.
- 296 3. Hewett TE, Stroupe AL, Nance TA, Noyes FR. Plyometric training in  
297 female athletes. Decreased impact forces and increased hamstring torques.  
298 *Am J Sports Med.* 1996;24(6):765-773.
- 299 4. Griffin LY, Agel J, Albohm MJ, et al. Noncontact anterior cruciate ligament  
300 injuries: risk factors and prevention strategies. *J Am Acad Orthop Surg.*  
301 2000;8(3):141-150.
- 302 5. Besier TF, Lloyd DG, Cochrane JL, Ackland TR. External loading of the  
303 knee joint during running and cutting maneuvers. *Med Sci Sports Exerc.*  
304 2001;33(7):1168-1175.
- 305 6. Boden BP, Dean GS, Feagin JA, Jr., Garrett WE, Jr. Mechanisms of  
306 anterior cruciate ligament injury. *Orthopedics.* 2000;23(6):573-578.

- 307 7. Agel J, Rockwood T, Klossner D. Collegiate ACL injury rates across 15  
308 sports: national collegiate athletic association injury surveillance system  
309 data update (2004-2005 through 2012-2013). *Clin J Sport Med.*  
310 2016;26(6):518-523.
- 311 8. Hewett TE. Neuromuscular and hormonal factors associated with knee  
312 injuries in female athletes. Strategies for intervention. *Sports Med.*  
313 2000;29(5):313-327.
- 314 9. Bahr R. Why screening tests to predict injury do not work-and probably  
315 never will...: a critical review. *Br J Sports Med.* 2016;50(13):776-780.
- 316 10. Hewett TE, Myer GD, Ford KR, et al. Biomechanical measures of  
317 neuromuscular control and valgus loading of the knee predict anterior  
318 cruciate ligament injury risk in female athletes: a prospective study. *Am J*  
319 *Sports Med.* 2005;33(4):492-501.
- 320 11. Markolf KL, O'Neill G, Jackson SR, McAllister DR. Effects of applied  
321 quadriceps and hamstrings muscle loads on forces in the anterior and  
322 posterior cruciate ligaments. *Am J Sports Med.* 2004;32(5):1144-1149.
- 323 12. DeMorat G, Weinhold P, Blackburn T, Chudik S, Garrett W. Aggressive

- 324 quadriceps loading can induce noncontact anterior cruciate ligament injury.
- 325 *Am J Sports Med.* 2004;32(2):477-483.
- 326 13. McLean SG, Huang X, Su A, Van Den Bogert AJ. Sagittal plane  
327 biomechanics cannot injure the ACL during sidestep cutting. *Clin Biomech*  
328 *(Bristol, Avon).* 2004;19(8):828-838.
- 329 14. Zeller BL, McCrory JL, Kibler WB, Uhl TL. Differences in kinematics and  
330 electromyographic activity between men and women during the single-  
331 legged squat. *Am J Sports Med.* 2003;31(3):449-456.
- 332 15. Hewett TE, Torg JS, Boden BP. Video analysis of trunk and knee motion  
333 during non-contact anterior cruciate ligament injury in female athletes:  
334 lateral trunk and knee abduction motion are combined components of the  
335 injury mechanism. *Br J Sports Med.* 2009;43(6):417-422.
- 336 16. Koga H, Nakamae A, Shima Y, et al. Mechanisms for noncontact anterior  
337 cruciate ligament injuries: knee joint kinematics in 10 injury situations  
338 from female team handball and basketball. *Am J Sports Med.*  
339 2010;38(11):2218-2225.
- 340 17. Krosshaug T, Nakamae A, Boden BP, et al. Mechanisms of anterior



- 341           cruciate ligament injury in basketball: video analysis of 39 cases. *Am J*  
342           *Sports Med.* 2007;35(3):359-367.
- 343    18.   Krosshaug T, Steffen K, Kristianslund E, et al. The vertical drop jump is a  
344           poor screening test for ACL injuries in female elite soccer and handball  
345           players: a prospective cohort study of 710 athletes. *Am J Sports Med.*  
346           2016;44(4):874-883.
- 347    19.   Roos PE, Button K, Sparkes V, van Deursen RW. Altered biomechanical  
348           strategies and medio-lateral control of the knee represent incomplete  
349           recovery of individuals with injury during single leg hop. *J Biomech.*  
350           2014;47(3):675-680.
- 351    20.   Taylor JB, Ford KR, Nguyen AD, Shultz SJ. Biomechanical Comparison of  
352           Single- and Double-Leg Jump Landings in the Sagittal and Frontal Plane.  
353           *Orthop J Sports Med.* 2016;4(6):2325967116655158.
- 354    21.   Jones PA, Herrington LC, Munro AG, Graham-Smith P. Is there a  
355           relationship between landing, cutting, and pivoting tasks in terms of the  
356           characteristics of dynamic valgus? *Am J Sports Med.* 2014;42(9):2095-2102.
- 357    22.   McLean SG, Walker K, Ford KR, et al. Evaluation of a two dimensional

- 358 analysis method as a screening and evaluation tool for anterior cruciate  
359 ligament injury. *Br J Sports Med.* 2005;39(6):355-362.
- 360 23. Aoki A, Kubota S, Morinaga K, et al. Detection of knee wobbling as a  
361 screen to identify athletes who may be at high risk for ACL injury. *Int*  
362 *Biomech.* 2021;8(1):30-41.
- 363 24. Mokhtarzadeh H, Ng A, Yeow CH, et al. Restrained tibial rotation may  
364 prevent ACL injury during landing at different flexion angles. *Knee.*  
365 2015;22(1):24-29.
- 366 25. Olsen OE, Myklebust G, Engebretsen L, Bahr R. Injury mechanisms for  
367 anterior cruciate ligament injuries in team handball: a systematic video  
368 analysis. *Am J Sports Med.* 2004;32(4):1002-1012.
- 369 26. Kristianslund E, Krosshaug T. Comparison of drop jumps and sport-  
370 specific sidestep cutting: implications for anterior cruciate ligament injury  
371 risk screening. *Am J Sports Med.* 2013;41(3):684-688.
- 372 27. Nagano Y, Sakagami M, Ida H, Akai M, Fukubayashi T. Statistical  
373 modelling of knee valgus during a continuous jump test. *Sports Biomech.*  
374 2008;7(3):342-350.

375

376

377 **Figure Legends**

378 Figure 1. Determination of relative frontal motion (RFM)

379 This graph shows one kinematic dataset from a single-leg landing. RFM was calculated as the

380 amount of valgus/varus movement in the frontal plane (a) divided by the amount of flexion in

381 the sagittal plane (b) during 1/30 second.

382

383 Figure 2. Kinematic data showing repeated knee wobbling and no knee wobbling.

384 (a) Repeated positive and negative RFMs were present. This RFM crossed the zero line

385 between Frames 4 and 5 and between Frames 5 and 6. (b) An example of kinematic data with

386 no knee wobbling. Only positive RFM values are present. This RFM never crossed the zero

387 line.
